# Supplementary material for: Small heat shock proteins are induced during multiple sclerosis lesion development in white but not grey matter
Source: PubMed Central journal article supplement (PMC4688967; doi:10.1186/s40478-015-0267-2), 2015-12-22
Supplement: 40478_2015_267_MOESM1_ESM.pdf [file 40478_2015_267_MOESM1_ESM.pdf]

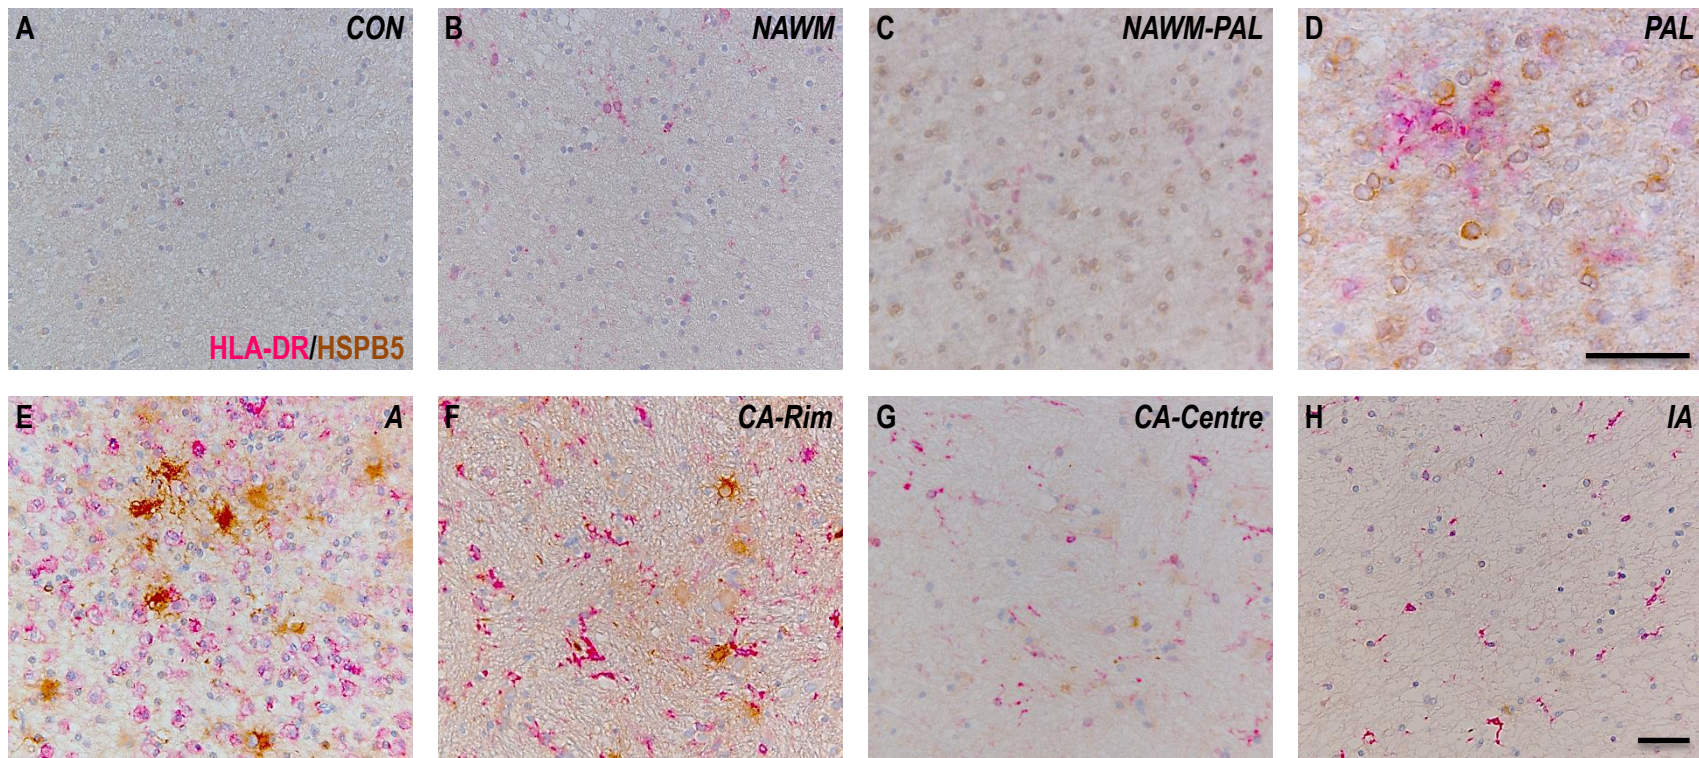

**Supplementary Figure 1.** Representative images of white matter tissues from the same non-neurological control and MS cases as used to examine expression of other small HSPs. Double immunohistochemistry staining for HLA-DR (pink) and HSPB5 (brown). Control white matter (A) and NAWM (B), NAWM surrounding a preactive lesion (C), preactive lesion (D), active lesion (E), chronic active lesion (F- rim, G - centre) and inactive lesions (H) from MS cases. Scale bar = 50µm
